# Supplementary material
Source: Springer Nature journal article supplement (https://www.springermedizin.de/resource/supplementary/12885_2010_2465_MOESM6_ESM.pdf/9461364)

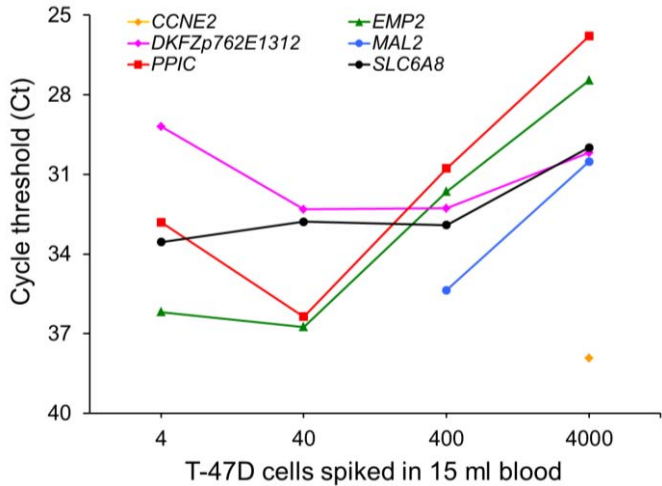

Supplement: MOESM6 [file 9461364]
